# Supplementary material for: Identification and functional analysis of ZmDLS associated with the response to biotic stress in maize
Source: Frontiers journal article supplement (doi:10.3389/fpls.2023.1162826), 2023-07-20
Supplement: Data_Sheet_1.zip [file Data_Sheet_1.zip]

Table S5. Primer names and sequences

| Prime name             | Primer names and sequences                     |
|------------------------|------------------------------------------------|
| q-ZmActin1-S           | CTGGTGGCCCTCTCTCCATATGG                        |
| q-ZmActin1-AS          | CAAACTGACACGACTCATGACA                         |
| q-Zm00001d032230-S     | CCCTGCTCTATTCCCGGTTG                           |
| q-Zm00001d032230-AS    | TGGGTCTCCAGTGTCGTTTG                           |
| q-Zm00001d045054-S     | GCTCGCGTGAAGATACAGGA                           |
| q-Zm00001d045054-AS    | AGGCTCCACAAACAACGAGT                           |
| q-Zm00001d024486-S     | CGTACGTTAGGACTCACGGG                           |
| q-Zm00001d024486-AS    | CCTCGTTTCGTCCAGCTTCT                           |
| q-Zm00001d004279-S     | AGTTGCCAGTATTCTATGC                            |
| q-Zm00001d004279-AS    | ACCATCTCCACCTTGATAA                            |
| q-Zm00001d002351-S     | ACGACGGATGGGTTTAGCTC                           |
| q-Zm00001d002351-AS    | TCACACATCAGACACCAGCG                           |
| q-Zm00001d002350-S     | CACAGGTGGAACATTGAA                             |
| q-Zm00001d002350-AS    | AGAATATCTCTACTGGTATATCG                        |
| q-Zm00001d053916-S     | TAGATGCAGCCGTAGCGATG                           |
| q-Zm00001d053916-AS    | CAAGCAGACGTGTGTGAAGC                           |
| q-Zm00001d015053-S     | TGGGTCGTACAGGGACTTCT                           |
| q-Zm00001d015053-AS    | GGAAGCCTCTGCTCCTTGTT                           |
| q-Zm00001d015054-S     | CAGCGTCATGTACTCGTA                             |
| q-Zm00001d015054-AS    | TCAAAGCACCAACATCATC                            |
| Zm00001d045054-S       | ATGGTAGCAGCAGCCAGCACCA                         |
| Zm00001d045054-AS      | GGCTATGGAAACAGGCTCCACAAAC                      |
| Zm00001d045054-pMAL-S  | CGGAATTCATGGTAGCAGCAGCCAGC                     |
| Zm00001d045054-pMAL-AS | ACGCGTCGACGGCTATGGAAACAGG                      |
| Zm00001d045054-1305-S  | aagtccggagctagctctagaATGGTAGCAGCAGCCAGCACCA    |
| Zm00001d045054-1305-AS | gcccttgctcaccatggatccGGCTATGGAAACAGGCTCCACAAAC |
| q-ZmMYB76-S            | TTCCAGTCATTGGGATGGGC                           |
| q-ZmMYB76-AS           | TGCATGTGGTGCCTCAATCT                           |
| q-ZmMYB91-S            | TGCTGTTGGTGGTCACTGTT                           |
| q-ZmMYB91-AS           | GTCGATCCTCCACAGCGAAA                           |
| q-ZmMYB97-S            | CGCACCGATATCTCCATCAAG                          |
| q-ZmMYB97-AS           | ATGAGATCGGGAATCGGCAC                           |
| q-ZmMYB101-S           | CTGCTCTGGCTCTCCTAGTC                           |
| q-ZmMYB101-AS          | CTCGGTACAGAGCGGACGAT                           |
| q-ZmMYB104-S           | ACGAACAGTGCACCAACAAC                           |
| q-ZmMYB104-AS          | GACCACTTGAGCTCGTCCAG                           |
| q-ZmMYB119-S           | GCAGTCTCTATCAGCGACCC                           |
| q-ZmMYB119-AS          | GGTTGTTGGCTCTTCCCAGA                           |
| ZmMYB76-1305-S         | aagtccggagctagctctagaATGTCACCACAAGAAGAGCGC     |
| ZmMYB76-1305-AS        | gcccttgctcaccatggatccCATCATGATTTCTTGATCTCCC    |
| ZmMYB101-1305-S        | aagtccggagctagctctagaATGCGCATGTGTGCGGCGG       |

---

|                          |                                                  |
|--------------------------|--------------------------------------------------|
| <i>ZmMYB101</i> -1305-AS | gcccttgctcaccatggatccGGAGGAGGAGTCGAGCA           |
| <i>ZmDLS</i> -PRO-S      | GGTTCATACGAAGAGCATGTATTAGTG                      |
| <i>ZmDLS</i> -PRO-AS     | CTGTGTAGCTCTCAACCAAGCTACC                        |
| <i>ZmDLS</i> -AbAi-S     | aattcgagctcggtaccgGGTTCATACGAAGAGCATGTATTAGTG    |
| <i>ZmDLS</i> -AbAi-AS    | atacagagcacatgctcgagCTGTGTAGCTCTCAACCAAGCTACC    |
| <i>ZmMYB76</i> -ADT7-S   | gccatggaggccagtgaattcATGTCACCACAAGAAGAGCGC       |
| <i>ZmMYB76</i> -ADT7-AS  | cagctcgagctcgatggatccTCACATCATGATTTCTTGATCTCCC   |
| <i>ZmMYB101</i> -ADT7-S  | gccatggaggccagtgaattcATGCGCATGTGTCGGCGG          |
| <i>ZmMYB101</i> -ADT7-AS | cagctcgagctcgatggatccTCAGGAGGAGGAGTCGAGCA        |
| <i>ZmDLS</i> -0800-S     | cttgatatcgaattcctgcagGGTTCATACGAAGAGCATGTATTAGTG |
| <i>ZmDLS</i> -0800-AS    | cgctctagaactagtggatccCTGTGTAGCTCTCAACCAAGCTACC   |
| <i>ZmMYB76</i> -62sk-S   | cgctctagaactagtggatccATGTCACCACAAGAAGAGCGC       |
| <i>ZmMYB76</i> -62sk-AS  | gataagcttgatatcgaattcTCACATCATGATTTCTTGATCTCCC   |
| <i>ZmMYB101</i> -62sk-S  | cgctctagaactagtggatccATGCGCATGTGTCGGCGG          |
| <i>ZmMYB101</i> -62sk-AS | gataagcttgatatcgaattcTCAGGAGGAGGAGTCGAGCA        |

---
