# Supplementary material for: Identification and functional analysis of ZmDLS associated with the response to biotic stress in maize
Source: Frontiers journal article supplement (doi:10.3389/fpls.2023.1162826), 2023-07-20
Supplement: Data_Sheet_1.zip [file Data_Sheet_1.zip]

Table S3. Basic physical and chemical properties of 43 ZmTPSs

| Gene name      | Aliphatic index | Grand average of hydropathicity | stable yes/no |
|----------------|-----------------|---------------------------------|---------------|
| Zm00001d000337 | 84.19           | -0.35                           | no            |
| Zm00001d004484 | 90.74           | -0.261                          | yes           |
| Zm00001d004509 | 93.38           | -0.145                          | yes           |
| Zm00001d024207 | 90.86           | -0.261                          | no            |
| Zm00001d024208 | 93.89           | -0.227                          | yes           |
| Zm00001d024210 | 90.49           | -0.287                          | no            |
| Zm00001d024211 | 90.69           | -0.269                          | yes           |
| Zm00001d024234 | 89.24           | -0.322                          | no            |
| Zm00001d024359 | 95.44           | -0.165                          | no            |
| Zm00001d024477 | 86.46           | -0.29                           | no            |
| Zm00001d024478 | 84.53           | -0.342                          | no            |
| Zm00001d024479 | 93.89           | -0.227                          | yes           |
| Zm00001d024480 | 99.47           | 0.059                           | no            |
| Zm00001d024481 | 84.53           | -0.337                          | no            |
| Zm00001d024486 | 89.68           | -0.243                          | yes           |
| Zm00001d024667 | 97.52           | -0.169                          | no            |
| Zm00001d024669 | 85.36           | -0.379                          | no            |
| Zm00001d029139 | 82.73           | -0.3                            | no            |
| Zm00001d029195 | 89.89           | -0.268                          | yes           |
| Zm00001d029523 | 85.22           | -0.403                          | no            |
| Zm00001d032230 | 88.44           | -0.248                          | yes           |
| Zm00001d035682 | 89.67           | -0.296                          | no            |
| Zm00001d037092 | 82.97           | -0.286                          | no            |
| Zm00001d045054 | 86.67           | -0.156                          | no            |
| Zm00001d047440 | 81.93           | -0.193                          | no            |
| Zm00001d004279 | 89.37           | -0.326                          | no            |
| Zm00001d018611 | 86.47           | -0.16                           | no            |
| Zm00001d024512 | 84.93           | -0.241                          | no            |
| Zm00001d029648 | 81.85           | -0.343                          | no            |
| Zm00001d032961 | 82.87           | -0.363                          | no            |
| Zm00001d048867 | 84.52           | -0.222                          | no            |
| Zm00001d048874 | 81.58           | -0.308                          | no            |
| Zm00001d041082 | 87.34           | -0.241                          | no            |
| Zm00001d002349 | 89.7            | -0.159                          | no            |
| Zm00001d002350 | 87.9            | -0.328                          | no            |
| Zm00001d002351 | 89.86           | -0.27                           | no            |
| Zm00001d024514 | 88.69           | -0.163                          | no            |
| Zm00001d032858 | 81              | -0.226                          | no            |
| Zm00001d049957 | 86.26           | -0.166                          | no            |
| Zm00001d015053 | 88.54           | -0.197                          | no            |

|                |       |        |    |
|----------------|-------|--------|----|
| Zm00001d015054 | 86.2  | -0.24  | no |
| Zm00001d053916 | 89.15 | -0.222 | no |
| Zm00001d053918 | 85.59 | -0.111 | no |
