# Supplementary material for: Identification and functional analysis of ZmDLS associated with the response to biotic stress in maize
Source: Frontiers journal article supplement (doi:10.3389/fpls.2023.1162826), 2023-07-20
Supplement: Data_Sheet_1.zip [file Data_Sheet_1.zip]

Table S7. Correlation coefficients and  $p$  values of *ZmDLS* and *ZmMYBs* ( $r>0.6$ ,  $p<0.01$ )

| Gene1        | Gene2           | Correlation | $p$ value   |
|--------------|-----------------|-------------|-------------|
| <i>ZmDLS</i> | <i>ZmMYB091</i> | 0.609935301 | 0.002000134 |
| <i>ZmDLS</i> | <i>ZmMYB119</i> | 0.711900584 | 0.000139025 |
| <i>ZmDLS</i> | <i>ZmMYB104</i> | 0.751980571 | 3.51E-05    |
| <i>ZmDLS</i> | <i>ZmMYB101</i> | 0.793412401 | 6.28E-06    |
| <i>ZmDLS</i> | <i>ZmMYB076</i> | 0.800030556 | 4.60E-06    |
| <i>ZmDLS</i> | <i>ZmMYB097</i> | 0.996319635 | 6.78E-24    |
