# Supplementary material for: Identification and functional analysis of ZmDLS associated with the response to biotic stress in maize
Source: Frontiers journal article supplement (doi:10.3389/fpls.2023.1162826), 2023-07-20
Supplement: Data_Sheet_1.zip [file Data_Sheet_1.zip]

Table S2. Amino acid sequences of 43 ZmTPSs

| Gene ID               | Amino acid sequence                                                                                                                                                                                                                                                                                                                                                                                                                                                                                                                                                                                                        |
|-----------------------|----------------------------------------------------------------------------------------------------------------------------------------------------------------------------------------------------------------------------------------------------------------------------------------------------------------------------------------------------------------------------------------------------------------------------------------------------------------------------------------------------------------------------------------------------------------------------------------------------------------------------|
| <b>Zm00001d000337</b> | MASHPAHRSSKAADDEELPKASSTFHPSLWGSFFLTYPPTAPQRAN<br>MKERAEVLRRVRKVLKGSTTDQLPETVNLITLQRLGLGYYYENE<br>IDKLLHQIYSNSDYNVKDLNLVSQRFYLLRKNGYDVPSDVFLSFKTE<br>EGGFACAAADTRSLLSLYNAAYLRKHGEEVLDEAISSTRRLRLQDLL<br>GRLLPESPFAKEVSSSLRTPLFRRVGILEARNYIPIYETEATRNEAVLE<br>LAKLNFNLQQLDFCEELKHCSAWWNEMIAKSKLTFVRDRIVEEYF<br>WMNGACYDPPYSLSRILTKITGLITIIDDMFDTHGTTEDCMKFAEAF<br>GRWDESAIHLLPEYMKDFYILMLETQSFEDALGPEKSYRVLYLKQ<br>AMERLVELYTKKIKWRDEDYVATMSEHLQVSAESIGANALTCSAYA<br>GMGDMSTKETFEWALSFPQFIRTFGSFVRLSNDVESTKREQTKDHS<br>PSTVHCYMKEHGITMDDACEKIKELIEDSWKDMLEQSLALKGLPKV<br>VPQLVFDFSRTTDNMYRDRDALTSSEALKEMIQLLFVEPIPE         |
| <b>Zm00001d004484</b> | MRERAERLKAQVRQAFDAASMDVAGLVITYVDTLERLGLDNHFRDL<br>IGGALDRIRAEELPEHGGGLHIVALRFHLLRQHGIWVSTDVFDARFD<br>DASGFCSSLCSDDDPRLLSLYNAAHMAVPGEVVLDDAIAFARGRL<br>LDILRGSKVRSPVSEQITRALDIPLPRFTRRLETMHYIAEYEHEETHD<br>GLLLELARLNFVLVRLHLRELKDLSLWWRDLYNTVKLPYARDRM<br>VEIYFWTCGMLHEEEYSLARMFFAKTFGMVSLMDDTFDVHATLDE<br>CHKLKEAMQRWDESEVYILPEYLRMLYIQTLSNREFEEILEPNKKY<br>RMAYTKEAYKLCSQNYLKEAIWSSQKYQPSFKEHEELSIMTSGLPML<br>LTILTLMGYGDEATPEAFEWVSSVPPEMVRAGSQVTRFLNDLSSYKL<br>GKHKKDMPSSVETYMVENGLTGDLKQVLPL                                                                                                                          |
| <b>Zm00001d004509</b> | MAPSNIVVQSSSTPPVAGGDEEFAPSVWGDFFVTYATPVSQASEQRM<br>SERAELLKAQVRQAFDAASMDVAGLITYVDTLERLGLDNHFRDLIG<br>AALERIGAEELPEHGGGLHIVALRFRLRQHGIWVSTDVFDARFEDA<br>GGFCSSLCSDDDPRLLSLYNAAHMAVPGEVVLDDAIAFARGRLDII<br>SKGEVRSPVSEQITRALDIPLPRFTRRLETMHYIAEYEHAAHDGLLL<br>ELARLNFVLVRLHLRELKDLSLWWRELYNTVKLPYARDRMVEIYF<br>WTCGMLHEEEYSLARMFFAKTFGMVSLMDDTFDVHATLDECHKL<br>KEAMQRWDESEVSILPEYLRLLYIKTSLNFKEFEEILEPNKKYRMAY<br>TKEAYKLCSKNYLKEAIWSNQKYQPSFKEHEELSIMTSGLPMLTILT<br>LMGFGDEATPEAFEWVSSVPPEMVRAGSQVTRFLNDLSSYKLKGNK<br>KDMPGVSVETYMVENGLTGDEAAAAIAALLENRWRILNQTRMEIDH<br>TLLPAAQVVLNMARANEIYHLHGRDAYTFGADLKDVLTTFLKQVL<br>PL |
| <b>Zm00001d024207</b> | MAAPTTLADGPRLGQQEMKKMSPSFHPTLWGDFFLSYEAPTEAQEA<br>QMREKAAVLKEEVRNMIKGSVDVPEIVDLITLQRLNLDYHYEDEIN<br>EKLTVVYKSNDYGGNLDLVSRRFYLLRKCGYDVSSDVFLKFKDQL<br>GNFVEADTRSLLSLYNAAFRLIHGETVLDEAISFTMRVLQDRLEHLE<br>SPLAEVSSALDTPLFRRVGTLEMKDYIPIYEKDAKQNKSIKFAKLN<br>FNLLQLRYSSELKECTTWWKELRVESNLSFVRDRIVEVYFWMSSGC<br>YDPQYSHSRILTKIVAFITLDDTLDSHATSCESMQLAEAIERWDESA                                                                                                                                                                                                                                                                |

|                       |                                                                                                                                                                                                                                                                                                                                                                                                                                                                                                                                                                                                                                   |
|-----------------------|-----------------------------------------------------------------------------------------------------------------------------------------------------------------------------------------------------------------------------------------------------------------------------------------------------------------------------------------------------------------------------------------------------------------------------------------------------------------------------------------------------------------------------------------------------------------------------------------------------------------------------------|
|                       | <p>VSLLEPYMKDFYMYLLKTFSSFENELGPDKSYRVFYLKEAVKELVR<br/>EYTKKIMKWRDEDYVPKTLKEHLKVSLISIGGTLVLCSAFVGMGDVV<br/>TKKIMKWMMSDAELVKSFGIFVRLSNDIVSTKREQREKHCVSTVQC<br/>YMKQHEITMDEACEQIKELTEDSWKFMIEQGLALKEYPIIVPRTVLE<br/>FARTVDYMYKEADKYTVSHTIKDMLTSLYVKPVL</p>                                                                                                                                                                                                                                                                                                                                                                           |
| <b>Zm00001d024208</b> | <p>MAAQTLTADGPRLGQQEMKKMSPSFHPTLWGDFFLSYEAPTEAQE<br/>AEMRERAGVLREKVRSMIKGSHDVPEIVDLIITLQRLNLDYHYEDEI<br/>NEKLTVVYNSNYDGGNLDVLSRRFYLLRCKGYHVSSDTRTLLSLYN<br/>AAYLRIHGETMLDEAISFTTRCLQDRLEHLESPIAAEVSSALDTPLFR<br/>RVGTLEMKDYPYIEKDAKQNKSIKFAKLNFNLLQLLYSSELKECTA<br/>WWKELCVESNLSFVRDRIVEVYFWMSGGCYDPQYSHSRILTKIVAF<br/>ITILDDTLDSLANSYESMQLAEVERIHEGFLHVKELVREYTKKIMKWR<br/>DEDYVPKTLKEHLKVSLISIGGTLVLCSAFVGMGDVVTKKIMEWV<br/>MSDAELVKSFGIFVRLSNDIVSTKREQREKHCVSTVQCYMKQHELT<br/>MDEACEQIKELTEDSWKFMIEQGLALKEYPIIVPRTVLEFARTVDYM<br/>YKEADKYTVSHTIKDMLTSLYVKPVL</p>                                                               |
| <b>Zm00001d024210</b> | <p>MAAPTLLTDGPRLGQQEMKKMSPSFHPTLWGDFFLSYEAPTEAQEA<br/>EMRQRAEVLREEVRNMIKGSVDPEIVDLIITLQRLNLDYHYEDEIN<br/>EKLAVVYNSNYDGGNLDVLSRRFYLLRCKGYHVSSDVFLNFKDQY<br/>GNFIEVDTRSLLSLYNAAYLRIHGETVLDEAISFTTRCLQDRLEHLES<br/>PIAAEVSSALDTPLFRRVGTLEMKDYPYIEKDAKQNKSIKFAKLNFN<br/>NLLQLLYSSELKECTWWKELRVESNLSFVRDRIVEVYFWMSGGCY<br/>DPQYSHSRILTKIVAFITILDDTLDSHANSYESMQLAEVERWDESA<br/>VSLLEPYMKDFYMYLLKTFSSFENELGPDKSYRVFYLKEAVKELVR<br/>EYTKKIMKWRDEDYVPKTLKEHLKVSLISIGGTLVLCSAFVGMGDVV<br/>TKKIMEWVMSDAELVKSFGIFVRLSNDIVSTKREQREKHCVSTVQC<br/>YMKQHEITMDEACEQIKELTEDSWKFMIEQGLALKEYPIIVPRTVLE<br/>FARTVDYMYKEADKYTVSHTIKDMLTSLYVKPVL</p>     |
| <b>Zm00001d024211</b> | <p>MAALTQTTDGPRLGEQEMKKMSPASFHPTLWGDFFLSYEAPTETQE<br/>AQMREKAGVLKEEVRNMIKGSVDMPPEIVDLIITLQRLNLDYHYEDE<br/>ITEKLTVVYNSNYDGGNLDVLSRQFYLLRCKGYHVSSDVFLNFKDQY<br/>YGNFIGADTRSLLSLYNAAYLRIHGETVLDEAISFTTRCLQDRLEHLES<br/>PIAAEVSSALDTPLFRRVGTLEIKDYPIYKDAKQNKSIKFAKLNFN<br/>NLLQLLYSSELKECTSWWELRVESNLSFVRDRIVEVYFWMSGGCY<br/>DPQYSHSRILTKIVAFITILDDTLDSHANSYESMQLAKAVERWDETA<br/>VSLLEPYMKDFYMYLLKTFSSFENELGPDKSYRVFYLKEAVKELVR<br/>EYTKKIMKWRDEDYVPKTLKEHLKVSLISIGGTLVLCSAFVGMGDVV<br/>TKKIMEWVMSDAELVKSFGIFVRLSNDIVSTKREQREKHCVSTVQC<br/>YMKQHEITMDEACEQIKELIEDSWKFMIEQGLALKEYPIIVPRTVLE<br/>FARTVDYMYKEADKYTVSHTIKDMLTSLYVKPVL</p> |
| <b>Zm00001d024234</b> | <p>MAADEARSVSRHSEEDMHGKHHSTLWGDFFLHHVPCRPGQYLIM<br/>KDNVEIMKEEVKKMLLDVGSSDLSHKLDLCIDTLERLGLDYHYTKEI<br/>DELMCNVFEARDQDLDTTTSQLFYLLRKHGYHSSDVFLKFRDDK<br/>GDIVTNDARCLLRMYEAAHVRVNGEEILDNLIHTKRQLQCIVDDLE</p>                                                                                                                                                                                                                                                                                                                                                                                                                       |

---

|                       |                                                                                                                                                                                                                                                                                                                                                                                                                                                                                                                                                                                                                         |
|-----------------------|-------------------------------------------------------------------------------------------------------------------------------------------------------------------------------------------------------------------------------------------------------------------------------------------------------------------------------------------------------------------------------------------------------------------------------------------------------------------------------------------------------------------------------------------------------------------------------------------------------------------------|
|                       | PTLQEEVRYALETPLFRRLNRVQARQFISTYEKSTTRINMLLEFSKLD<br>FNILLTLYCEELKDLTLWWKEFQAQANTTIYARDRMVEMHFWMMG<br>VFFEPQYSYSRKMLTQLFMIVSVLDDLYDSHCTTEEGNAFTAALQR<br>WDEEGVEQCPTYLRTLYTNIRATIKAIEEDLNFQNNKHAKLVKGLII<br>DMAMCYNAAETEWDRDKKYVPATVDEHLKISARSSGCMHLVSQGFIS<br>MGDVATSEALEWASTYPKIVRAVCIIARLANDIMSYKNLFYLQREAS<br>NNTMVSTVQTCAKEYGTTTVEQAIEKIRELIEEAWMDITHECLRQP<br>QPKALLERAVNLARTMDFLYKDADGYTDSRSIKGILDSLYVHLID                                                                                                                                                                                                         |
| <b>Zm00001d024359</b> | MATSGPVLLVSQAQQRKSRTYTPSPWGDFFLHHVPCTPSQLLSMKE<br>RAKVKEQQVRQIIHETIASSDLLHVFEKFRDESGAIVSGDDASCLLM<br>LHDAAHARTHGEEILDGIVAWSKSRQLQSLVVQKNLLEPELAEVRC<br>ALETPRFRRVKRVEARRYIPVYEKKSTRDETILEFAKLDYNISQAIYC<br>DELKELTIMVELHFWMLGVIHDPYCSRIMIVKIFVFISLFDLMDNY<br>STTEESNVFTAAMERWDEQMAQQLPAGLKALLVRIFNATNKIEEEL<br>KLQGNMHAELIKKMVINSAKFYHAEVKWRDEHFVPTSLEEHLQKSI<br>PTSACMQMANLALVSLGNVTTREDVEWVFTFPKIIRGACIVGRIAN<br>DIVSHEREQASSDHVASTVQTCMKQYNVTIKEANEKLRAVIEEAWM<br>DIVQDSLEQERPRALLDIINVARVADFMYKREDAYTLSFVIKDIIAS<br>MYIYSV                                                                                          |
| <b>Zm00001d024477</b> | MAPPPPALAEETAAFHPSLWGDFFLTYPPTAPQQACMKERA EVLR<br>EDVRKILMGPCELPETLGLILTLQRLALDYYYENEIDKLLHCIYDDD<br>DSDYDDKDLNLVSLRFYLLRKNGYDVSSDVFLVFKTEEGSFAYADD<br>TASLLSLYNAAYLRKHGEEVLDEAISFARRRCLEAGILRTPLFRRVGI<br>LEARNYIPIYEKEAARNDAVLELAKLNFNLQQIAFCEELKHCTLWW<br>KDFLAKSKMAFVRDRIVEVYFWMNGACYDPPYSRSRIILTKITSLVT<br>IIDDMFDTYGTTEDC TKFHEAIGRWDESALPLLPQYMKGFYLFQLET<br>FRSFEDELGPENSYRVHYLKKSMERLVQQYYREIKWRDENYVPKT<br>MTEHLQVSMESIGSVALACAAYVGMGDVITKETLDWVLSYPQFLT<br>YGIVRLSNDVVSTKREQTKDHSPSTVHCYMKEHGTTMDDACEKIK<br>ELIEDSWKDMQLQQSLALKGLPKAVPRTVFDLRTADNMYKNCDAF<br>TSSEVLREMIRLLFVEPIPE                            |
| <b>Zm00001d024478</b> | MASPPAHRSSKAAD EELPKASSTFHPSLWGSFFLTYPPTAPQRANM<br>KERA EVLRERVRKVLKGSTTDQLPETVNLILTLQRLGLGYYYENEID<br>KLLHQIYSNSDYNVKDLNLVSQRFYLLRKNGYDVPSDVFLSFKTEE<br>GGFACAAADTRSLLSLYNAAYLRKHGEEVLDEAISSTRRLRLQDLLG<br>RLLPESPFAKEVSSSLRTPLFRRVGILEARNYIPIYETEATRNEAVLEL<br>AKLNFNLQQLDFCEELKHCSAWWNEMIAKSKLTFVRDRIVEEYFW<br>MNGACYDPPYSLSRILTKITGLITIIDDMFDTHGTTEDCMKFAEAFG<br>RWDESAIHLLPEYMKDFYILMLETFSFEDALGPEKSYRVLYLKQA<br>MERLVELYSKEIKWRDDDYVPTMSEHLQVSAETIATIALTCSAYAGM<br>GDMSIRKETFEWALSFPQFIRTFGSFVRLSNDVVSTKREQTKDHSPST<br>VHCYMKEHGTTMDDACEKIKELIEDSWKDMLEQSLALKGLPKVVP<br>QLVFD FSRTTDNMYRDRDALTSSEALKEMIQLLFVEPIPE |
| <b>Zm00001d024479</b> | MAAQTLTADGPRLGQQEMKKMSPSFHPTLWGDFFLSYEAPTEAQE                                                                                                                                                                                                                                                                                                                                                                                                                                                                                                                                                                           |

---

|                       |                                                                                                                                                                                                                                                                                                                                                                                                                                                                                                                                                                                                                                                    |
|-----------------------|----------------------------------------------------------------------------------------------------------------------------------------------------------------------------------------------------------------------------------------------------------------------------------------------------------------------------------------------------------------------------------------------------------------------------------------------------------------------------------------------------------------------------------------------------------------------------------------------------------------------------------------------------|
|                       | <p>AEMRERAGVLREKVRSMIKGSHDVPEIVDLIITLQRLNLDYHYEDEI<br/> NEKLTVVYNSNYDGGNLVLVSRRFYLLRKCgyHVSSDTRTLLSLYN<br/> AAYLRIHGETMLDEAISFTTRCLQDRLEHLESPIAEVSSALDTPLFR<br/> RVGTLEMKDYIPIYEKDAKQNKsILEFAKLNFNLLQLLYSSELKECTA<br/> WWKELCVESNLSFVRDRIVEVYFWMSGGCYDPQYSHSRILTKIVAF<br/> ITILDDTLDLANSYESMQLAEAVERIHGFLHVKELVREYTKIEKW<br/> RDEDYVPKTLKEHLKVSLISIGGTLVLCsAFVGMGDVVTKKIMEWV<br/> MSDAELVKSFGIFVRLSNDIVSTKREQREKHCVSTVQCYMKQHELT<br/> MDEACEQIKELTEDSWKFMIEQGLALKEYPIIVPRTVLEFARTVDYM<br/> YKEADKYTVSHTIKDMLTSLYVKPVLm</p>                                                                                                                         |
| <b>Zm00001d024480</b> | <p>MERRWWNEMIAKSKLTFVRDRIVEEYFWMNGACYDPPYSLSRILT<br/> KITGLITIIDDMFDTHGTTEDCMKFAEAFGRWDESaiHLLPEYMKDF<br/> YILMLETfQSFEDALGPEKSYRVLYLKQAASILHIYPLMSALYVHESI<br/> LKEHTVIVII</p>                                                                                                                                                                                                                                                                                                                                                                                                                                                                    |
| <b>Zm00001d024481</b> | <p>MASPPAHRSSKAADDEELPKVSSTFHPSLWGSFFLTyQPPTAPQRANM<br/> KERAeVLRERVrKVLKGSTTDQLPETVNLILTLQRLGLGYYENEID<br/> KLLHQIYSNSDYNVKDLNLVSQRfYLLRKNgyDVPsDVFLSFKTEE<br/> GGFACAAADTRSLLSLYNAAYLWKHGEEVLDEAISSTRLRLQDLLG<br/> RLLPESPFakeVSSSLRTPLFRRVGILEARNYIPIYETEATRNEAVLEL<br/> AKLNFNLQQLDFCEELKHCSAWWNEMIAKSKLTFVRDRIVEEYFW<br/> MNGACYDPPYSLSRILTKITGLITIIDDMFDTHGTTEDCMKFAEAFG<br/> RWDESaiHLLPEYMKDFYILMLETfQSFEDALGPEKSYRVLYLKQA<br/> MERLVELYTKIEKWRDEDYVATMSEHLKVSaESIGANALTCSAYAG<br/> MGDMSITKETFEWALSFPQFIRTFGSfVRLSNDVESTKREQTKDHSP<br/> STVHCYMKEHGITMDDACEKIKELIEDSWKDMLEQSLALKGLPKV<br/> VPQLVDFDSRTTDNMYRDRDALTSSEALKEMIQLLFVEPIPE</p> |
| <b>Zm00001d024486</b> | <p>MDATAFHPSLWGDFFVKYKPPTAPKRGHMTERaELLKEEVrKTLK<br/> AAANQITNALDLIITLQRLGLDHHYENEISELLRFVYSSSDYDDKDL<br/> YVVSLRFYLLRKHGHCvSSDVFTSFKDEEGNFVVDDTKCLLSLYNA<br/> AYVRTHGEKVLDEAITFTRRQLEASLLDPLEPALADEVHLTLQTPLF<br/> RRLRILEAINYIPIYGKEAGRNEaILELAKLNFNLAQLIYCEELKEVTL<br/> WWKQLNVETNLSFIRDRIVECHFWMTGACCEPQYSLSRVIATKMTA<br/> LITVLDDMMDTYSTTEEAMLLAEaIYRWEENAAELLPRYMKDFYL<br/> YLLKTIDSCGDELGPNRSFRtFYLKEMLKVLVRGSSQEIKWRNENY<br/> VPKTISEHLEHSGPTVGAFQVACSSfVGMGDSITKESFEWLLTYPEL<br/> AKSLMNISRLLNDTASTKREQNAGQHvSTVQCYMLKHGTTMDEAC<br/> EKIKELTEDSWKDMMELYLTPTEHPKLIAQTIVDFARTADYMYKETD<br/> GFTFSHTIKDMIakLFVDPISLF</p>                     |
| <b>Zm00001d024667</b> | <p>MIEAIRAALGSTGDGEINISAYDTAWVALVKSLNGDEGPQFPSCIDWI<br/> AQNQLPDGSWGDGIFFLVQDRIISTLACIIALKSWKIHDDACKKGTL<br/> STALSNNNKPSYVLYRATYIYVTHEEYILLNRHWSEEGLAFTKGCrv<br/> KDIDDTAMGFRLRLRHGYHVSPCVFKRFENGdGQFVCYARQSNQS<br/> VSAMYNLYRAADQGSFPGDDPVLQRAKSYsRAFLRERRASDQLND<br/> KWIISEGLPSEVGyGLDFPWEACLPIETRMYLEQYGGSHDVWIGK</p>                                                                                                                                                                                                                                                                                                                         |

---

|  |                                                                                                                                                                                                                                                                                                                                                                                                                                                                                                                                                                                                                                                                                                                                                                                                                                                                                                                                                                                                                                                                                                                                                                                                                                                                                                                                                                                                                                                                                                                                                                                                                                                                                                                                                                                                                                                                                                                                                                                                                                                                                                                                                                                                                                                                                                                                                                                                  |
|--|--------------------------------------------------------------------------------------------------------------------------------------------------------------------------------------------------------------------------------------------------------------------------------------------------------------------------------------------------------------------------------------------------------------------------------------------------------------------------------------------------------------------------------------------------------------------------------------------------------------------------------------------------------------------------------------------------------------------------------------------------------------------------------------------------------------------------------------------------------------------------------------------------------------------------------------------------------------------------------------------------------------------------------------------------------------------------------------------------------------------------------------------------------------------------------------------------------------------------------------------------------------------------------------------------------------------------------------------------------------------------------------------------------------------------------------------------------------------------------------------------------------------------------------------------------------------------------------------------------------------------------------------------------------------------------------------------------------------------------------------------------------------------------------------------------------------------------------------------------------------------------------------------------------------------------------------------------------------------------------------------------------------------------------------------------------------------------------------------------------------------------------------------------------------------------------------------------------------------------------------------------------------------------------------------------------------------------------------------------------------------------------------------|
|  | VLYRMNMVSNMYLKAADFGNFQRLCRLEWHDLKRWCDKIS<br>NIETYGVASRGALLRAYFLAAACIFEPSRAAERLAWARA AVLAE AIS<br>CCLLSNVDDACACNKTTAEWL VQEFTNGDDIADSYEYSPARRDDD<br>GPNSPA WGASSLAGVLREL VNLQASGNA AVAGCLRGAWIEWLMAW<br>TGKETEKASRAGDTALLARTVEICSGRRRCGTEKDL D L L L R D Y S K L<br>QQLTRCIC SRLATEAPALNGETMDKIDALDRMVGLEMRELAQCVFR<br>SGGSSVDRETRQTFLHVTKSYYYVALCSPETVEHHISKVLFEDVV<br><b>Zm00001d024669</b> MTTSVPVPLASQPQAPQRKPRTYTPSPWGDFFLHHTPCTPSQLLSM<br>KERAKVKEQQVRQIIQETMASSNLLRKLELVDTLQRLGVDYRYEE<br>IDQLLSVYDDGDKDGGGSDDL YLTS LRFYLLRKHGYTTSSDVF EK<br>FRDERGSVSSDDASCLLMLYDAAHTRTHGEEILDDIIAWSK SRLQSL<br>LEEK NLEPELAE EVRCALET PRFRRVKRVEARRYISAYEKKGGRDGT<br>ILEFAKLDYNISQAIYCDELKELTVWWKDFQSHIDMRFTDRDLVELH<br>FWMLGVIHEPYYSYSRIMMTKFFIFGNFFDDL YDNYGTTEESDVFTA<br>AMERWDEQIAHQLSAGLKVLLASILNATNKIEEELKLQGNMHAELV<br>KKMVIDTAKSYHAEVKWRDEHFVPATVEDHLQISIPSSGCMQITNLA<br>LISSRGNMTTREDVEWVFTFPKIVRGACIVGRICNDIMSHEREQASL<br>DHVASTVQTCMKQYGVTTTEEANEKLRAVIEMAWMDIVQDNLEQER<br>PIALLDTMINVARIADFIYKREDAYTLSFSLKGHIGSMYVYSV<br><b>Zm00001d029139</b> MASHNASVSPEMASGFHPTVWGDFFIDYSPQPSQKSEEWTAERMS<br>QLKEK IAGLFGACTTTAEQLNLVDTLQHLSIDHHFSTQILSVL TSAHA<br>AEELNSGGACLHDVALRFLLRQQGFVWSPEVFDRFRDENG SFDVG<br>VADDDARGLLSLYNAAYLLTHGEAELEEAALFARQRLESMSMRGSL<br>EYPLAQQVS RALH LPLPRTVRRVETLHYVSEYGGDP THEHEHDPSV<br>LEFARLDFELLQRLHVKELKALS RWWKDLYNEAGVTYSRDRVVEC<br>YLWSYTAYYEEEHARARMILAKMIALIILTDDTYDVRATLEECRRW<br>DESAVSLLPDY LKKFY LKLMNIFEFEFELEPHEKCRVAFSRKAFT<br>LSSNYLQEA EW FHGRYKPRFEDQVKVSTVRS GAPFAAVGLLVGMG<br>GDVATQEAEWAMGCTDAVKAF AEVTRFMNDLAS YKRGKNKNDV<br>DSSVECYISEHGVTAEVAF AQISSLIEDAWKTINGARFENSKLLPAVQ<br>RVADITAS MPLMYGDNKDAFTFS DGLKGLIERLFLNRP<br><b>Zm00001d029195</b> MAPKTVWGYFFIDYIPEPLQVSDKQRVVELKGEVARLFEDCNCKDV<br>VERMNLVDV VQRLGIDHHFKEQIDTALKNIQGAEFNSSDLHEVSLRF<br>RLLRQHGLWVPADQFDKFRRQEDGSFS SADIADDPKGLLGLYNAASL<br>LIHGEEVLEEALLFARRHLESIRRGGLHDS PYLSEQVGRSLKIPLPR<br>TLKRLEAVSYIPEYSSADDTTYIHPEILELARLDFNLLQHVHQNELRT<br>VTQWWKGLCDVIGPDYGRDRIVECYFWAFSMY YEEEHARARMILA<br>RLIMLASLLDDTFDDRATLQECRELNKAIERWDESDDISLLPECIQKF<br>FLEVIRNFAEFEDELEAHEKYRVAYARKAYQLLSKSYLQEVEWCHQ<br>GYTPSFDDHVS VSTASAGIQVLCVGM LVGMGDAATKEVFEWMIGS<br>NNRVVRACAEVTRFMDDMADFKRGKNKTDVATTVECYMKEQNV T<br>GEVAFDKIGSFVEDAWKTLNQAALVGDRALLPVVQRVAGLAMSM M<br>VFFHGKIDRYTDSEHLKETLEDLFVNHVPLC<br><b>Zm00001d029523</b> MKERRDVL I KEAKKRLTGKHDDPLAEMNLIDAVQRLGVSYHLQDEI |
|--|--------------------------------------------------------------------------------------------------------------------------------------------------------------------------------------------------------------------------------------------------------------------------------------------------------------------------------------------------------------------------------------------------------------------------------------------------------------------------------------------------------------------------------------------------------------------------------------------------------------------------------------------------------------------------------------------------------------------------------------------------------------------------------------------------------------------------------------------------------------------------------------------------------------------------------------------------------------------------------------------------------------------------------------------------------------------------------------------------------------------------------------------------------------------------------------------------------------------------------------------------------------------------------------------------------------------------------------------------------------------------------------------------------------------------------------------------------------------------------------------------------------------------------------------------------------------------------------------------------------------------------------------------------------------------------------------------------------------------------------------------------------------------------------------------------------------------------------------------------------------------------------------------------------------------------------------------------------------------------------------------------------------------------------------------------------------------------------------------------------------------------------------------------------------------------------------------------------------------------------------------------------------------------------------------------------------------------------------------------------------------------------------------|

---

---

|                       |                                                                                                                                                                                                                                                                                                                                                                                                                                                                                                                                                                                                                                                                                  |
|-----------------------|----------------------------------------------------------------------------------------------------------------------------------------------------------------------------------------------------------------------------------------------------------------------------------------------------------------------------------------------------------------------------------------------------------------------------------------------------------------------------------------------------------------------------------------------------------------------------------------------------------------------------------------------------------------------------------|
|                       | HASLQKLNSMEFSNESFHEISLQFWLLRQERYCMSCDVFQSFMDQ<br>RKLNANIKSDVRALLALYEAHLGTPTEQFLTEAQRQTSSLRSMV<br>GHLEKPLADKVRHALRTPSFRRMKRLEARLYIPLYEEDKEDCDEMIL<br>ELAKLDFYLLQRIHREEVKEICEWYHGLDSPRKLFYARHRPTEAYF<br>WALGVYYEPQYAKARKLLAKFIATITPYDDTFDNYGIWEELQPFAD<br>VMQRWDMKEAEGNECYSDFARFMFGTMIEIENALPKDIGRRNVN<br>FIRDIINEVCKGYVTEIGWRDTKYIPPLEEHLKVTLTICFYWGINCTA<br>FVVFEENVTEEILKWMSRFPQIVKDSIISRLMDDIVAHEFETERDNV<br>ATAVTCYMKQYKTTKEEASDALWNSVEQAWKSMNHEYLTWTSIPS<br>SLLIRVINLARMMETMYKEIDGYTDSKLLKEWISMLLDQPIPF                                                                                                                                                                      |
| <b>Zm00001d032230</b> | MATTGTTSMAPVFHPTVWGDFYFIKFVPEPLQVSDETMAERIRHLR<br>EEVSGMFQACKNVVDKTNLVDVVQRLGIDHHFEEQIATALASIHSA<br>GLFNSSSLHEAALRFLLRQQGFVWPADELVKFIKNEDGSFIDGITN<br>DPKGLLSLYNAHLVTHDEGTTTLEDAIAFARQHLEAARRCSLSPL<br>AEQVGRALGIPLPRTLKREEAIAFIPEYSSQQDQQVYSPVILELAKLD<br>FNLLQHLHQEELKEISHTYVRTYVLNGRWWKDLSGEIGLGYVRDRI<br>VECYFWSYTVHYERGQARARMILAKVFMLTSLDDTYDVHATLEE<br>ARELNKAIQRWDESDVSLLPEYLKKFFVKVISNREFEDESHEKY<br>RNVYNIKGFQTLKHYLQEAWEFHHGCTPSFKDQVNVSVITGGAQ<br>VLSIGLLVGMGHEATREAFWAIGDTDAIWACGEVSRFMDMSAFK<br>NGRNKMDVASSVECYIKEHNPSEVALARINSLVEDAWKTINQAPF<br>KYPALFPVVQRVTSLAKSMTLLFLDKRDAYTYSKDFQTTLETHFVR<br>HIPL                                                             |
| <b>Zm00001d035682</b> | MASFSCLKPQHNGSSSRIYHTICSATASEWRSLLRSRSSVSWWKKHT<br>RLRLRCCQGSNGGDSRLSQNTGIFHPSIWGDFFLGCS SSP EAAAS<br>SQQKAWMERCDELKEEVGRMLMVVEANSPLHERLHFIDALESLCLD<br>HLLKEEIGAALTQIETAGVSDDCDIGTVSLWFYLLRKHRRRASPDVF<br>VRFRDAEGGFQANDPGDLLRLYNAAHFRTHGETILDEAIAFARSRL<br>MMLPYVKGPLLAHEVRSSLEIPLPRRVRIYESKYYIHAYETSGTLHE<br>KVLQLAKLNSNVLQLHHQELKILTRWWEDMQIGSKLPFARDRIVE<br>CFLWILGVYYEPCHSRARIILTMVIAIVTLLDDIFDSFATPQECEILTNC<br>IESWDPKGAQDLPGCMKFALEKILDSYQTITNMLHREDKYRMTYLR<br>HFTEDLVRFSNMEVKMLQKGYIPDSVEEHLKVSLRTGGCPILSCACF<br>VGMDDIATKDFFDWISSVPKMVRALSIIRLRLADDLHSYEREQLIPHV<br>ASTIDTYMKKHNVSIEVAQENIHKLKEESWKDLNSEWLNPCNDVYP<br>KQLLERIFNLARTMEFMYNQEDNFTNCHNLKDTIRCLLVEPYRIHI |
| <b>Zm00001d037092</b> | MAGITGVMNMKLAARPSSGRHSRGCRAVVP SAGKQMLLVRRHPP<br>GSASWPTRATGGGGGGVPAGATAADSSGQAK EEEEEEDRASRNTSSF<br>EPSIWGDFFLTYSPLATSSAQKARMVHRAEQLKKQVAKLIAASGA<br>CSLYHRIHLVDALERLCLDYLFED EINDMVTQIHNVDVSGCDLQTV<br>AMWFYLLRNHGYRVSSDVVFAKFRDEQGGFAANNPRDLLNLNA<br>ACLRTHGETILDEAASFTSKCLKSLAPYTYMEASLASEIKRALEIPLP<br>RSVRIYGAKSRIA EYGNQTEANELVLELAKLNYNLVQLQHQEELKII<br>TRWWNDLELQTRLSFARDRVVECYFWMVGVYFEPSSYRARVILSK                                                                                                                                                                                                                                                                    |

---

|                       |                                                                                                                                                                                                                                                                                                                                                                                                                                                                                                                                                                                                                                                                                                                                                       |
|-----------------------|-------------------------------------------------------------------------------------------------------------------------------------------------------------------------------------------------------------------------------------------------------------------------------------------------------------------------------------------------------------------------------------------------------------------------------------------------------------------------------------------------------------------------------------------------------------------------------------------------------------------------------------------------------------------------------------------------------------------------------------------------------|
|                       | <p>VLAIVSLDDTYDVYGTSQECELFTKCIESWDPAAATGGRLPGNMKFI<br/> FAKILDTCQSFEDELAPDEKYRMHYLKTFIIDLVRAYNEEVKWREQ<br/> GYVPATVEEHLQVSARSGGCHLLSCTSFVGMGDVADQEAFAEWREK<br/> MSSHVASTMESCMKEHQVPLEVARVKIQUETIDETWKDFNEEWLNLN<br/> TNSHLPRELLERIFNLTRTMVYIYQQDDAYTNCHVIKDTINSLFVEPV<br/> SIT</p>                                                                                                                                                                                                                                                                                                                                                                                                                                                                    |
| <b>Zm00001d045054</b> | <p>MVAAASTTQAHWQMTGSSYACTCTAFRSISTKLAARSSAGRRSRGR<br/> RSAVDPSAGGPPLPPPVVIAGAVASPGKRMPPSPIGCTSRAATASSR<br/> QAKEDDGASRNVS GFEP SIWGDFFLTYS SPLATSSLHKAWMVHRAE<br/> QLKEEVAAKLVAASSACSLHRRHILHVLERLCLDHLFEDEISDMLA<br/> RMNDVDVSGCDLQTVAMWFYLLRKHGYSVSSDVFAEFRDEQGGG<br/> FTANSARDLLSLHCAACLATRGETILDEAISFTAKSLKSTAPYTGAA<br/> LACEIKRALEIPLRRRVRIYEAKSRIAIEYGREAEADELVMELAKLNY<br/> NLVQLQYQQELKIITRWNGLELQSRLSFARDRVVECYFWIVGVYF<br/> EPSYSRARIILTKVIAIVSLLDDTYDVYGTPQECELFTECIESWDPAVA<br/> GGLPENMKFIFGKILDYQSIEEELAPEEKYRMPYIKNFIIIDLVRAYN<br/> KEVRWREQGYVPATVEEHLQVSARSGACHLLSCASVFGMGDVAGE<br/> EAFEWVCSVPKLVQALCILRLSDDLKSYEREKMAPHVASTIESCMR<br/> EHEVPLEVARVKIQEMIDETWKDFNEEWLNMNKHQPAELLERIFNL<br/> TRTMVYMYKNDDAYTNCHVIKDTINSLFVEPVSA</p> |
| <b>Zm00001d047440</b> | <p>MQQQLPTVCDAKHGWCP LPRVNQQSKADGTAVAAAACHGAFEPS<br/> VWGDDFFVTYTSPSFSQEESEEQMGERANFLKGEVRKKFEAAAMSAI<br/> DAAMLVDVAVHLGIDHCFREEIATALRSVHEDEEGEFGSCDDLHTVA<br/> VRFLVLRQHGLWVSADVFDKFRDDKGSFSKSLLC SNPRGLLSLYNA<br/> AHMAVTPEEKVLDDAIAFARSHLVEAMIGELRSPMVEQVSRSDIPL<br/> PRFSRRLESMHYIAEYQEEEEGHDAQILELARLEFELVRS LHLREL<br/> EICRNKKDVANAHECEY GATGEEAFAFIANMTENAWRKINQACME<br/> MDPAMPLPAFKVAVVDLSRSIEIHYLGGKRDAYTFGSNLKDLVTSFLK<br/> PCA</p>                                                                                                                                                                                                                                                                                                       |
| <b>Zm00001d004279</b> | <p>MSLRTTAWLSARPGHHQP VQCLSSPEKPRRRSANYQPTSWDYDALL<br/> SLDSGRPGDQVHPSSYYKMKRRIRDMLLKKVEPSSKLQTIDAMQRL<br/> GISYHFEDEISNILYSISNESTKAQYTYDNIAFTALKFRLLRENGFPTIL<br/> GPLGYHNYEKFITKTPSLEDANTLLLLYEASYLAFGDEEKL DVARTF<br/> SAKALKQLMPFMLPHLREGVAHSLELPLHWRASRLETRWFIDYYAR<br/> DRNMCPLLLQFAELDFNQVQYEHQKDLAVVTRWWKKIGLGEKLPF<br/> ARDRLMECFHYANGIVWDPKLGTCRQMLAKVSNLIVYLDDLYDVY<br/> GTIEELVLFTNAIARWDAIPNETLPEYMKALYSIIYDTSNEVAEHALK<br/> KHGCSMHYLLQKSWYDICLAFLVEAKWHHGNYP SIIQKYLENGW<br/> VSSSAPLLLLHAFAMLD SVVNMSTISPLQTKLRLVQHVS LILRLCND<br/> SATHLDELGRGDAPS FIALHMIENGGNENDSRKAMQE HILKSWKVI<br/> NEEAFDSCQYSMPFNKACIDLARISHCVYQGGDGF GTPNGLKKKQI<br/> RDLFLDPIDICNKQ</p>                                                                     |
| <b>Zm00001d018611</b> | <p>MQQQQPLDLHSAALLFRMLRGLGIPASTDMLMSALLREESGKLAA<br/> DSDGLLALYQASYLAFFGETELDQARAFAVAKLAGRRDDGSADSCP</p>                                                                                                                                                                                                                                                                                                                                                                                                                                                                                                                                                                                                                                              |

|                       |                                                                                                                                                                                                                                                                                                                                                                                                                                                                                                                                                                                                                                                                                                                                                                                                                                                                                                                                                                         |
|-----------------------|-------------------------------------------------------------------------------------------------------------------------------------------------------------------------------------------------------------------------------------------------------------------------------------------------------------------------------------------------------------------------------------------------------------------------------------------------------------------------------------------------------------------------------------------------------------------------------------------------------------------------------------------------------------------------------------------------------------------------------------------------------------------------------------------------------------------------------------------------------------------------------------------------------------------------------------------------------------------------|
|                       | <p>SSTHLSLPLHWTAPRLQAMWSLKDQVERGRPDHQDQAIILQLAQLD<br/> FNLVQALHRRELAEVTRWWKETSRLGEHAFARDRVVECFCAACIA<br/> PEPRLAECREVLAKAGALIVHLDDIYDVYGTPELRAFTDAVASWE<br/> HSATRTTHSPRRSWWRRSGSSRDSGHMPSPAQYVSNGWVTSTGPLL<br/> LLHALPAAAAIPRPPIITTAACVDDYYPRLVELSSTIFRLCNDCASHEA<br/> ESERGDAPSSIACCMAEPWCAGGEEQARAAVQGVIAETWKLLNRE<br/> VCCSCAEHEESLTTMANLCLNLARVIHICIYQDGDGITTPTHRMKRM<br/> VKDLLFNPIIL</p>                                                                                                                                                                                                                                                                                                                                                                                                                                                                                                                                                                         |
| <b>Zm00001d024512</b> | <p>MDLPRPQAPCCRRPADLRPAPCCIDAPRPSDLRGCAPAAGALWKPS<br/> ASYPRAAVPPASVRLHDISVRGEEDEQKEMLQQMTDGVRAMLGSIG<br/> DGAINISAYDTAWVALVKSLEGGNGPQFPSSLRWIVENQLPDGSWG<br/> DEEFFLVYDRMINTLACVIALESWEIHADMCEKGLSFIRENLWRLEH<br/> SGSDDWMVVSFEITFPQLLEMARDLGLDVPCDEPSLRAIYARRDAK<br/> LARIPKELLHASPTTLLLSIEGMPGLDWERLLKLQCSDFSMSPPAPT<br/> AYALMQTGDTKCLEFLNGIVSKFSGGVPFTYPPVDFEHLWVVDRIE<br/> RLGIGRHFTEIKECLEYVHRYWGDEGLPATRDGPVSDVDDTAMGF<br/> RLLRLHGYDVSPSVFKHFEQDGAFCYCPGQSNKSVTAMYNLYRAS<br/> QVAFPGEDELRRAEAYSREFLCRRRASGELKDKWVIPKDLPGEVAY<br/> ALDVPWKASLPRIETRMYLEQYGGADDVWIGKVLYRMSLVNNELL<br/> LRTAQADFRSFQRQCKLEWHGLRKWASRRNLQAYGVTSNSTLRSY<br/> FLAAASIFEPDRATERLGWARTAVLAEAVSSCLRDGRCRADGMLRE<br/> LTSGIHLRNDNPAASLVHALHELIGLLAFDNASYNLLDAWKQWL<br/> AMWTAQGHESVALLLVRTVEICSGRRRSASATDDGQAHSLSEYSQ<br/> LEQLTSSVCSKLAAAGTGDGDDLSPASVEDAADRHRVDLEMQTLA<br/> RCVLRSSSIDAVTRQTFLHVARSFYYVAHCSARTVDAHISKVLFE<br/> VV</p>                                                  |
| <b>Zm00001d029648</b> | <p>MVLSSSCTTVPHLSSLAVVQLGPWSSRIKKKTDAAVAVPAAAGRWRA<br/> RARAQDTSESAAVAKGSSLTPIVRTDAESRRTRWPTDDDDAEPLVDE<br/> IRAMLTMSDGDISVSAYDTAWVGLVPRLDGGEGPQFPAAVRWIRN<br/> NQLPDGSWGDAALFSAYDRLINTLACVVTLTRWSLEPEMRGRGLSF<br/> LGRNMWKLATEDEESMPIGFELAFPSLIELAKSLGVHDFPYDHQAL<br/> QAIYSSREIKVKRIPKEVMHTVPTSILHSLEGMPGLDWARLLKLQSS<br/> DGSFLFSPAATAYALMNTGDDRCFSYIDRTVKKFNGGVPNVYPVDL<br/> FEHIWAVDRLERLGRISRYFQKEIEQCMDYVNRHWTEGICWARNSD<br/> VKEVDDTAMAFRLRLHGYSVSPDVFKNFEKDGEFFAFVGQSNQA<br/> VTGMYNLNRASQISFPGEDVLHRAGPFSYEFLLRRKQAEALRDKWI<br/> ISKDLPGEVVYTLDLFPWYGNLPRVEARDYLEQYGGGDDVWIGKTL<br/> YRMLPLVNDVYLELARMDFNHCQALHQLEWQGLKKWYTENRLM<br/> DFGVAQEDALRAYFLAAASVYEPCCRAAERLAWARAAAILANAVSTHL<br/> RNPSFRERLEHSLRCRPSSEETDGSWFNSSSGSDAVLVKAVLRLTDSL<br/> AREAQPIHGGDPEDIHKLRLSAWAEWVREKADAADSVCNGSSAVE<br/> QEGSRMVHDKQTCLLLARMIEISAGRAAGEAASEDGDRRIIQLTGS<br/> CDSLKQKMLVSQDPEKNEEMMSHVDDDELKLRIREFVQYLLRLGEK<br/> KTGSSETRQTFLSIVKSCYAAAHCPPHVDRHISRVIFEPVSAAK</p> |



---

|                       |                                                                                                                                                                                                                                                                                                                                                                                                                                                                                                                                                                                                                                                                                                                                                                                                                                                                                                                                                                                                                                                                                                                                                                                                                                                                                                           |
|-----------------------|-----------------------------------------------------------------------------------------------------------------------------------------------------------------------------------------------------------------------------------------------------------------------------------------------------------------------------------------------------------------------------------------------------------------------------------------------------------------------------------------------------------------------------------------------------------------------------------------------------------------------------------------------------------------------------------------------------------------------------------------------------------------------------------------------------------------------------------------------------------------------------------------------------------------------------------------------------------------------------------------------------------------------------------------------------------------------------------------------------------------------------------------------------------------------------------------------------------------------------------------------------------------------------------------------------------|
| <b>Zm00001d032961</b> | MKLLSPAAAPSSSPLFPPRIVEAAARQSGPCRIRIRIRGKAAAAGGGG<br>GAGATGPRGSLRLAGWWRAQQQAPATATTTQQPDNVSSAKVFQTS<br>RVETESI AKWPGKPQDLEDEHQAEAEELQPLIDQVRAMLRSMNDG<br>DTSASAYDTAWVAMVPKVGGDGAQPQFPATVRWIVDHQLPDGSW<br>GDSALFSAYDRMINTLACVVALTKWSLEPARCEAGLSFLHENMWRL<br>AEEEAESMPIGFEIAFPSLIQTARDLGVVDFPYGHPALQSIYANREVK<br>LKRI PRDMMHRVPTSILHSLEGMPDLDPRLNLQSCDGSFLFSPSA<br>TAYALMQTGDKKCFEYIDRIVKKFNNGV PNVYPVDLFEHIWVVDRL<br>ERLGISRYFQREIEQCMDYVNRHWTE DGICWARKSNVKD VDDTAM<br>AFRLRLRHGYNVSPSVFKNFEKDGEFFCFVGQSTQAVTGMYNL NRA<br>SQISFQGEDVLHRARVFSYEFLRQREEQGMIRDKWIVAKDLPGEVQ<br>YTLD FPWYASLPRVEARTYLDQYGGKDDVWIGKTL YRMPLVNNDT<br>YLELAIRDFNHCQALHQL ECNGLQTWYKDNCLDAFGVEPQDVLRS<br>YFLAAACIFEPSRAAERLAWARTSMIANAISTHLRDIS EKKRLECFV<br>HCLYEENDVSWLKRNPNDVILERALRRLINLLAQEALPIHEGQRFIH<br>SLLSLAWTEWMLQKANKEENKYHKCSGIEPQYMVHDRQTYLLLVQ<br>VIEICAGRIGEAVSMINNKDNDWFIQLTCATCD SLNHRMLLSQDTMK<br>NEARINWIEKEIELNMQELAQ SLLLRCD EKTSNKKTKKTLWDVLRS<br>LYYATHSPQH MIDRHVSRVIFEPV                                                                                                                                                                                                                                                                                                                                  |
| <b>Zm00001d048867</b> | MIEAIRAALGSTGDGEINISAYDTAWVALVKSLNGDEGPQFPSCIDWI<br>AQNQLPDGSWGDGIFFLVQDRIISTLACIIALKSWKIHDDACKKGT L<br>STALSNNNKPSYVLYRATYIYVTHEEYILLNRHWSEEGLAFTKGCRV<br>KDIDDTAMGFRLRLHGYHVSPCVFKRFENG DGQFVCYARQSNQS<br>VSAMYNLYRAADQGSFPGDDPVLQRAKSYSRAFLRERRASDQLND<br>KWIISEGLPSEVGYGLDFPWEACL PRIETRMYLEQYGGSHD VWIGK<br>VLYRMNMVSNDMYLKA AKADFGNFQRLCRLEWHDLKRWCDKIS<br>NIETYGVASRGALLRAYFLAAACIFEPSRAAERLAWARA AVLAEAIS<br>CCLLSNVDDACACNKTTAEWL VQEFTNGDDIADSYEYSPARRDDD<br>GPNSPAWGASSLAGVLREL VNLQASGNAAVAGCLRGAWIEWLMAW<br>TGKETEKASRAGDTALLARTVEICSGRRRCGTEKD LDLLLRDYSKL<br>QQLTRCIC SRLATEAPALNGETMDKIDALDRMVGLEMRELAQCVFR<br>SGGSSVDRETRQTF LHVTKSYYYVALCSPETVEHHISKVLFEDVV<br>MSPWQCM PSTATLLHVHQVTDATRRLPPIRF SHLNAPNPRPRPGCA<br>MGATKGEKLKTLGHDLLVPATPQH KDKQSGMPEMIEAIRVALRSMG<br>DEFPCIDWIAQNQLPDGSWGHDIFFLAQDRIINTLACVIALKSWKIH<br>DDACTKGLSFITENMWRLTRDDENWALSGFEIIFPMLLEKAKHLGID<br>IPLDDPMLEAIRAKRELKLNKIPREALHA EPTTFLLSIEGMPGLDWK<br>RLRKLQCPDGSYMSSPAPTAYALMQTGDAKCFEFLDKLIDKFNGGV<br>PFVYPMEMFGRLWAVDRLERLGISGYFKSEIEDYLDYVYRHWSEEG<br>LAYTKGCLVKDIDDTAMGFRLRLHGYDHVSPCVFKRFENG DGQF<br>VCYARQSSQSVSAMYNLYRAADQASFPGDDDDHVLR RARSYSRAF<br>LRQRRASGQLNDKWIISEGLPDEVGYGLDFPWGASLPRIETRMYLE<br>QYGGSRDVWIGKVLYRMNMVSNDMYLEVAKVDFS NFQRLCRLEW<br>HDLKRWCDKSDLETYGVAPGGALRAYFLAAACIFEPGQAAERLAW |

---

---

|                       |                                                                                                                                                                                                                                                                                                                                                                                                                                                                                                                                                                                                                                                                                                                                                                                                                                                                                                     |
|-----------------------|-----------------------------------------------------------------------------------------------------------------------------------------------------------------------------------------------------------------------------------------------------------------------------------------------------------------------------------------------------------------------------------------------------------------------------------------------------------------------------------------------------------------------------------------------------------------------------------------------------------------------------------------------------------------------------------------------------------------------------------------------------------------------------------------------------------------------------------------------------------------------------------------------------|
|                       | ARAAVLAKAISCCLLSNNDTCACNKTTAEWLVRFTNGDNVAGYY<br>YDYNPARRDDDEPNSPA WGASSLAGVLRELVHLQASGNAAVAECRL<br>GAWMEWLMAWTEKETEEASHAGDTALLLARTVEICSGRLRGTEQD<br>LELRLPDYSKLQQLTRCICSR LATEAPALIESNVLKQNGETMDKVDA<br>LDRMVGLEMRELAQCVFRSGGSSVDRETRQTFLHVTKSYYYVALC<br>SPETLEHHISKVLFEDVV                                                                                                                                                                                                                                                                                                                                                                                                                                                                                                                                                                                                                         |
| <b>Zm00001d041082</b> | MTPLRYAASPHLQPPFLGYKSSNVDGRSRTRQQAMIAERSSSSSTSG<br>RGGQLEDRIREQLLNAELSPSSYDTAWAAMVPAPGSLAASRYPCV<br>DWILRNQRSDGSGWGLDPSLRKDALSSTLACVLALRTWGVGEEHVG<br>KGLRFIGHNSTSVTDCDKCDTPAGFNVIFPGMLERGIGMGLEIPLAH<br>ADLDAILRLRDTTELKSIAASGRSKAYMSYVAEGLGDLLEDWDQAAM<br>AYQRKNGSFFNSPATTA AAAIHNGYNKRAIGYLDALISESGSSSVPA<br>VYPRKVHSQLRMVDTLERMGISPSFSYEINAILDMTYSSWLRNDDE<br>VMLDMATCAMAFRLLRMHGYHVSSDALAQFSEESSFHDSIEAHLN<br>GTEALLELYKASQVQILEEPPVLESIFSWSGKLLRRKQCSDSDDPAE<br>VEHVLKFPSYATLDRLEHRRNIERFKTGGFQMLKSAFRVSHADEEIL<br>TLATDGFHSSQAVYQQEIEQLNRWVKEVRLPELEFARVLPILFSA<br>ATMFPAELSEARIAWSKSSVLTTIVDDLFDTGDSMEELNLVTLFDL<br>WDAHQEAGFYSERVEIVFRAVYDTCKHLVGKAAAVQNRGVMEDIA<br>DLWVDVVRAMMPEAEWRMSGRVPSMEEYLPIGEVSFAIGPIVPM<br>AYLVGPELPEDVVGSAEYEEMLSLVNLSGRLLNDLQTYERERKQGK<br>INSVLLLADPSYCGSVEAATREVRSVIEASRRKLLRLVLRDGA AVPRP<br>AGQLFWNM SKVLHLFYMDRDGYSSPLTNAIDEVLKPLQMGRRRE<br>EDQLPGRVRSNQN  |
| <b>Zm00001d002349</b> | MPDVMAAALTGFSPRGVIPSRGRASLPGVARAYAERRLVAENTSLPN<br>MHKEQLETHRNQLRKPQLPPSSYDTAWVSMVPVRGSHQTPRFPQC<br>VEWILQNQQDDGSGWGSQSDSSVSKDVLLSTLACVLALKRWNVG<br>RENIWRGLHFIGNFVSAMDEQFTSPIGFNFTFPGLLSLGIDMGLEFP<br>VRQIDVCGILHRREME LKRLAVDSSFGRKAYMAFIPEGFGNMLDWD<br>QVMKFQRKNGSLFSTPSTTAVALIHKYNDQALQYLNLLVNEFGSAVP<br>AMYPSRVHCQLSMVDALEKMGISQRFVSEIESILDMAYNCWLQND<br>ELMMDIATFAMAFRLLRMNGYDVSSDEL SHVAGASTFHDSLQGYL<br>NDTKSLLELYKTSKVTLSENDLILDRIGSWSGNLLKDKMCCSRVQK<br>DSIFGEIEYAVNFPLYSTLERLEHKRNIEHFDAGWSMLTTKSSSFRIN<br>QEFLALAVEDFSFSQRVYRDELRLHDSWVKENKLDQLQFARQKLT<br>CYLSAAATVFSSELS DARISWAKNGVLTTVVDDFFDVGGSKEELEN<br>LIALVEKWHGHHAVEFYSEQVKIVFSAIYTTVNLHGAMASAAQGRD<br>LTNHLVEIWLDLLRSMMVEAEWQRCQYVPTVEEYMTNAVVSFALG<br>PIVLPALYFVGQELLEH AVKDEEYDKLFRVSTCGRLLNDYQSLERE<br>GNQGKLNSVSLVLHSGGSM SIEAAKKAMQKSIDVSRDLRLVLR<br>KESAVPRPCKELFWKMCKILHLFY SQNDGFSSPKEMVSAVNAVINEP<br>LKVQNSTTFLSSSSR |
| <b>Zm00001d002350</b> | MAKPLNLTPAFLSLMATSCRFSSGGHAHRFASSLPCGRTTPTPTTSS<br>STRPAAQVSPDRSKQRDDEAASETTIRQQLQQVDVLENTGISRH FAG                                                                                                                                                                                                                                                                                                                                                                                                                                                                                                                                                                                                                                                                                                                                                                                                 |

---

|                       |                                                                                                                                                                                                                                                                                                                                                                                                                                                                                                                                                                                                                                                                                                                                                                                                                                                                                                                                                                                          |
|-----------------------|------------------------------------------------------------------------------------------------------------------------------------------------------------------------------------------------------------------------------------------------------------------------------------------------------------------------------------------------------------------------------------------------------------------------------------------------------------------------------------------------------------------------------------------------------------------------------------------------------------------------------------------------------------------------------------------------------------------------------------------------------------------------------------------------------------------------------------------------------------------------------------------------------------------------------------------------------------------------------------------|
|                       | <p>EIKCILDRTYRCWLERHEEIMQDTTTCAMAFRILRMNGYDVSCDLL<br/> YHVVETSGIHDPLRGHLNDTRTLELHKASTVSISEDESILDSIGLRSS<br/> TLLREQMESSGALQNPPLFREVEHALYHPFYATLDRLTHRWNIENFN<br/> TTEHQMLDTPYLSSRYTSRDILALGIRDFNSSQLTYQQELQHLKSWV<br/> KECRLDQLPFVRQNLAYFLLSAAGCMYSPELSEARTLCAKNGALIT<br/> VVDFFFDVGGSSKEELENLVMVLVELWDEHRKIEFYSEHVEIIFSSIYNS<br/> VNQYGAKASLLQDRNVTKHLVQIWLDLLKSMMTEVEWRLNKYVP<br/> TEEEYMTNASLTFALGPVLPALYFVGPKIPESIVKDPEYDELFLKMS<br/> TCGRLNDVQSFEREYKEGKLNIVSLLVLHGGSMSISDARRKLQKPI<br/> DTCRRDLLRLVLREESVVP RPCKELFWKMCKVCYFFYSRTDGFRRSP<br/> VERAKEVNAVINEPLKLQENHTHMSVL</p>                                                                                                                                                                                                                                                                                                                                                                                                      |
| <b>Zm00001d002351</b> | <p>MAMPVKLTPASLSLKAVCCRFSSGGHALRFGSSSLPCWRRTPPTQRSTS<br/> SSTTRPAAEVSSGSKQHDQEASEATIRQQQLQVLDVLENMGISRHFA<br/> AEIKCILDRTYRSWLQRHEEIMLDTMTCAMAFRILRLNGYNVSSDEL<br/> YHVVEASGLHNSLGGYLNDTRTLELHKASTVSISEDESILDSIGSRS<br/> RTLLREQLES GGALRKPSLFKEVEHALDGPFYTTLDRLHHRWNIENF<br/> NIEQHMLETPYLSNQHTSRDILALSIRDFSSSQFTYQQELQHLESWV<br/> KECRLDQLQFARQKLAYFYLSAAGTMFSPELSDARTLWAKNGVLT<br/> IVDDFFDVAGSKEELENLVMVEMWDEHHKVEFYSEQVEIIFSSIYD<br/> SVNQLGEKASLVQDRSITKHLVEIWLDLLKSMMTEVEWRLSKYVPT<br/> EKEYMINASLTFGLGPVLPALYFVGPKISESIVKDPEYDELFLKMST<br/> CGRLNDVQTFEREYNEGKLNSVSLVLHGGSMSISDAKRKLQKPI<br/> DTCRRDLLSLVLREESVVP RPCKELFWKMCKVCYFFYSTTDGFSSQ<br/> VERAKEVD AVINEPLKLQGSHTLVSDV</p>                                                                                                                                                                                                                                                                                              |
| <b>Zm00001d024514</b> | <p>MSTVWCSSVLSATATSV PKNPSRSNPSNHLRFTFSNSSAKSSCHRFSS<br/> CRSNRPPPLYWACIESRRRISCGVQTTAQSGTRVVERNASLEIEERH<br/> ARIRKQLLKPELSPSAYDTAWVAMVPSPGSPQAPCFPQCQWILENQ<br/> LDNGSWGHNEDSSADKKETILATLACVIALKKWDVGAHITKGIQ<br/> FIARNFQTVTDEQIVVPIGFDFTFSGMFTLAINMGLQFPVRQTDIDGI<br/> LRLRENELKRYDGDKSTAIEAYCAYVAEGFENLLDWNVDMKFQAK<br/> NGSLFNPSATAAALVANYDDKALQYLNLLVTQFGSAVPTVFPQNIH<br/> CQLSMVDTLESVGISRHFSAEIKAVLDMVYSLWLQKEEEIMLDAET<br/> CAMAFRILQMNGYDVSTDWLSHIAEASN FHNSLQGYLCDTKTLLE<br/> MYKASKVILSERDLTLENIGCWTGSLLREKLCSDGAQRVPILEEEVEY<br/> ALKFPHYAIVDPLNNRRSIEHLDARGSQTLKTKYLPCHVSQDILALA<br/> VEDFCFSQSIYQDELQNIISWEKENRMDQLQFVRQRLAYCYLAAAT<br/> TISPHELSDARVACA KSIMLTVVVDFFDVGGSSKEEQENLIELVENW<br/> DEHHKVEFCSEKVEIVFYAVYNTVNQLGSMASAVQKRDTVTKHLAE<br/> TWLKVMLCMLTEADWQRRQFVPTVEEYMANAVSSLALAVIILPAQ<br/> YFLGETLSDYMKVDHEYSNLSELMFTCSRLNDIRSVEREFEAGKL<br/> NSVSLALHSGGMSIEAAKKETHGSLESYRRGLVALVRRQDSVVP<br/> RSCKELFWKLCKTIHLFYFQIDGFTSPKEMVGAVNQVINEPLELQSS<br/> NTHV</p> |
| <b>Zm00001d032858</b> | <p>MASLSFASSHASLFCCQQSSSAILRPAGALLRLSRRQPSSHTISTTDQ</p>                                                                                                                                                                                                                                                                                                                                                                                                                                                                                                                                                                                                                                                                                                                                                                                                                                                                                                                                  |

---

LFPRRSRMPRNVDTTHAAAERNSPSTMSSLEAVDELETNGDSAVVVV  
REQQQQHLLMGATDDGLPPSPYDTAWVAMVPAPGNPLVPRFPQC  
VDWILQNQRSDGSWGPDDGGSDHPSSPLGKDALMSTLACVLAKT  
WDAGEEHVRKGLSFVGNNSPSCVMTGDERDAPVGFVIFPGMLAR  
AIDMGLDIPMMTQANVDAFIRLRDTELNRMAATTGSKAFMSYVAE  
GLGDVLDWDEAAMVYQRQNGSFFNSPATTAAAAIHGNNDRALRYL  
DSLVNMFSSVPTVYPRSTYSRLHMVDTLQKMGLSRSFVSEINEML  
DMTYRSWLANDDEEMMLDMSTCAMAFLRLRMHGYDVSSDGLAQ  
FSSESSFRDSVHGQANDTEALLELYKASQIQITEDELVLVDIRSWSAK  
LLKEQLGSDKVSRSDAQEVQQVLKFPFYTTLDRLEHRRHIEQFKA  
GGFHMLKSAYRFCKEDEELVSLAVQGFHSSQALYQQELQFLTRWAK  
EARLHDLEFARIMPMNTFFPNAALMYAPELSEARILCTKNCMLATAV  
DDLFDVGGSSREEMENLVRLIDMWDEHEEVGFCSERVEILFRAIYDTS  
KELAAKAMAVQNRSVINHVAELWADLVRAMMTEAEWSMRGHVPS  
SMEEYMQVAETSFALGPIVLMPLYLIGPELPEAVVRCPEYKQLFHHM  
NVCGRLLNDLQSYEREGKQKGKINSVLLVAPRHGGSIEAAKSEVRRAI  
EASRRELLRMLVAEADATVPRPFRQEFWNMCKMVHLFYMEDDCYS  
SPKELVHAANMVVFDPLRVREL

**Zm00001d049957**

MASFSGGAPPPSHSGLRHYPTVHRPGLLPATAACTRGGAEELLRRQ  
SRATTTPRTKLAEKMVREKLLMGLPPPSSYDTAWLAMVPAPGSARAS  
RFPQCVIEWIMQNQRSDGSWGLQGRQGDDPSLLIKDALSSTLACVL  
ALKTWGVGDEHVKGGLRFIGHNLSVTTYGDVGSRPVGFNVIFPG  
MLARCIGMGVEMPLAPADVDGIFRLRDKELPRWLDVDFGTSTIIKA  
FRAYLAEGLGNWDEAMAYQRKNGSLFNSPATTAAAAIHSYDRGAV  
QYLDSLVNLFSSVPAMYPRILYARLRMVDALEKTGISRSFSSEINGI  
LDMTYASWLGNDEEIMLDMTTCAMAFLRLRMHGYDVSSDASLGQ  
FSEESSFHDSIQGCLGDTEALLELHKASQVQIREQETAILRSIGSWSA  
KLEEQQLRSNKVSRNIDPAEVDYALKHPFYTTLDRLEHRRNIEHFKT  
TAIQVLKSAYRACVPAGEEIAALAAADFHASQTVYQEELQCLESWV  
KELRLQELEFARIMPLICFFPPAATLFPCEQHEARMAMSKHNILLTVV  
DDLFDVGGSSREEMENLVKLVEMWDAHNRVGFCSERVEIVFRAIYDT  
SNHLAAKAAAVQKRNIHHLAELWANTVRAMMAEANWAMTGHLPL  
TFEEYMAAGEPSFGLGPIVLASLYLVGPELPEDVVTQSQEYNEMFRH  
MNVCGRLLNDLQSYEREKEQGVNSVLLLLALEEEGGSIEAVKREV  
RRAIEASRIQLRLVLRNESEVPWPCRQVFWNICKVVHQFYVHVDG  
YASAKQMMHSCTPGTRWCITRCRSHARRPTYNKFSQLSLGVGVHC

**Zm00001d015053**

MYSLPGATMSAAPASIISSSSSFEPLLLAAASPAAAAAAANSHHQVR  
QRGHLVRTLAASSSSNTLLRSDFDLQEGLTTDVKRMLRQRQKSGG  
GREMLVTIDNLKRLCIDHYFEEEEIEGAMATGACTRLLHSDDLFDATL  
AFRLREAGHDVSAKDDVLRRFIDGASGDFKLSLSNDVRGLLSLHD  
MSHLDVGGEAALLHRAKEFSSRHLASAVRYLDDPSLAEYVRQSLD  
HPYHLSLTQYKARHHLRYLQSLPSRDAEVERLAVAQFQNLKSLHQG  
EMREIKRWWMDLGLAEIPVVRDQVMKWYMWMSMAALQGSSFSR  
YRVEITKIISLVYVDDIFDLVGTLEELSAFTEAVKMWDTVAADSLPS

---

---

|                       |                                                                                                                                                                                                                                                                                                                                                                                                                                                                                                                                                                                                                                                              |
|-----------------------|--------------------------------------------------------------------------------------------------------------------------------------------------------------------------------------------------------------------------------------------------------------------------------------------------------------------------------------------------------------------------------------------------------------------------------------------------------------------------------------------------------------------------------------------------------------------------------------------------------------------------------------------------------------|
|                       | CMRSCYKALHTVTNEIAEIAQKEHGSNHVNRLRKAWAVLFDGFMV<br>EARWLATDQVPTAEDYLRNGVITSGVPLTFMHIFSMLGYDDPSTEE<br>EEAIIDHMPSIISCPAKILRLWDDMGSAEDEAQEGFDGSYRDFYLME<br>NPSRSPGEAEAHMRGLIAREWEVLNRECFCRRTFPSNLVQVCLNTA<br>RMVSVMYSYNKEQRLPVLEDYAAMMLVL                                                                                                                                                                                                                                                                                                                                                                                                                         |
| <b>Zm00001d015054</b> | MYSLPGATMSAAPARVISSSSSSSFVEPLLLAAASSAAANSHHQVRQ<br>RGHLVRTLAASSSSNTLLRSDFDLQEGLTTDVKRMLRQRQKSGGG<br>REMLVTIDNLKRLCIDHFFEEEIEGAMATGACTRLLHSDDLFDATLA<br>FRLREAGHDVSAKEDVLRRFIDGVSGDFKLSLNNDVRGLLGLHD<br>MSHLDVGGEEAALLHRAKEFSSSHLASAVRYQDNPSLAEYVRQSLD<br>HPYHLSLTQYKARHHLRYLQSLPSSCRDAVERLAVAQEFQLNKS<br>QREMREIKRWWMDLGLAEEIPVVRDQVMKWYMWWSMAALQGSSF<br>SRYRVYVVDIFDLVGTLEELSAFTEAVKMWDATAADSLPSCMRSC<br>YKALHTVTNEIAEIAHKEHGSNPINRLRKAWVVLFDGFMVEARWLA<br>TDQVPTAEDYLRNGVVTSGVPLTFLHIFSMLGYDDPSTEEEEAAIDH<br>MPSIISCPAKILRLWDDMGSAEDEAQEGFDGSYRDFYLMENPSRSPG<br>EAEAHMRGLIAREWVELNRECFCRRTFPSDIAQVCLNTARMVSVM<br>YSYNKEQRLLVLEDYAAMMLVL                    |
| <b>Zm00001d053916</b> | MLATPHHINLEGLRTPRCISLTCILAPARRIGTSMSERCIFSSTLASPA<br>ADGNNSRRGGRHRGDSIVTRSSAAANTLPLLRNDDFDLREGLTDVR<br>NVLQRQKSGCSSRDMMVTVDNLKRLCIDHYFQEEIERAMGACCM<br>GLIHSDDLFDATLAFRLREAGHGVSAADDVLRRTDDDDSGGEFR<br>LDLSKDIRGLLSLHDMSHLDMGGEELLCKARVFSRHHLASAVRYLE<br>PSLGEYVRQSLDHPYHLSLTQYKARHHLAYLQSLPVRDTALERLVA<br>AEFQLNRSLSHQKEMQAIKRWWMELGLVQEIPVVRDQVLKWYMWWS<br>MTALQGRSFSRHRVQITKIIALVYVVDIFDLVATLDELSLFAEAVKM<br>WNSTAAESLPSYMRSCYKALYTVTNEIADTAEKEHGLNHVNLRLK<br>AWAALFDGFMVEARWLATDKVPTAEDYLTNGVVTSGVPLTFVHIFI<br>MLGCDDDQSTQALVDHMPSVISCPAKILRLWDDMGSAEDEAQEGF<br>DGSYRDFYLMENPRCSRSDAEAHMRSLIAREWEELNRECLCKRTFS<br>SSFTHVCLNAARMISVMYSYNKEQRLLVLEDYARMLIL |
| <b>Zm00001d053918</b> | MPQGTLPCEYECRVLKWYMWWSMTALQGSSFSRFRVEMTKIISLVYV<br>DDIFDFVGTLEELSLFTEAVKMWDTVAAADSLPSYMRSCYNALYTITN<br>EIAEMAEEKKHGLNSINHLRKAWATLFDGFMVEARWLAIQVPTAED<br>YLRNGVVTSGVPLTFVHIFTLMGCEQSIEALIDQMPSVISCPAKILRL<br>QDDMGSAKDEAQEGFDGSYRDFYKLENPRCNRNDAAEHMRSLIAR<br>EWEELNRECLYTRTFSSNCTRVCLNTARMIGVMYSYNKEQRLLVLE<br>DYAKMLIL                                                                                                                                                                                                                                                                                                                                     |

---
