# Supplementary material for: Identification and functional analysis of ZmDLS associated with the response to biotic stress in maize
Source: Frontiers journal article supplement (doi:10.3389/fpls.2023.1162826), 2023-07-20
Supplement: Data_Sheet_1.zip [file Data_Sheet_1.zip]

Table S6. Formula for protoplast preparation

Recipe for the enzymatic solution

| Stock Solutions                                | Final Concentration |
|------------------------------------------------|---------------------|
| Cellulase R-10                                 | 1.5%                |
| Macerozyme R-10                                | 0.4%                |
| D-mannitol                                     | 0.4 M               |
| KCl                                            | 20 mM               |
| MES (pH=5.7)                                   | 20 mM               |
| 55°C 10 min, leave to cool at room temperature |                     |
| CaCl <sub>2</sub>                              | 10 mM               |
| β-mercaptoethanol                              | 5 mM                |
| BSA                                            | 0.1%                |

Recipe for the W5 solution

| Stock Solutions   | Final Concentration |
|-------------------|---------------------|
| NaCl              | 154 mM              |
| CaCl <sub>2</sub> | 125 mM              |
| KCl               | 5 mM                |
| MES (pH=5.7)      | 2 mM                |

Recipe for the MMg solution

| Stock Solutions   | Final Concentration |
|-------------------|---------------------|
| Mannitol          | 0.4 M               |
| MgCl <sub>2</sub> | 15 mM               |
| MES (pH=5.7)      | 4 mM                |
