# Supplementary material for: Identification and functional analysis of ZmDLS associated with the response to biotic stress in maize
Source: Frontiers journal article supplement (doi:10.3389/fpls.2023.1162826), 2023-07-20
Supplement: Data_Sheet_1.zip [file Data_Sheet_1.zip]

## Sheet: Fig. 3A
	B73	B73-treated
GeneID	Cycle threshold	Cycle threshold
ZmDLS	28.2895	26.7153
	28.2706	26.6266
	28.2517	26.5378
Zm00001d032230	24.7904	26.9105
	24.8482	26.9614
	24.906	27.0123
Zm00001d024486	26.6874	18.2393
	26.7077	18.366
	26.728	18.4926
Zm00001d004279	26.7837	25.6181
	26.6663	25.3898
	26.5489	25.1616
Zm00001d002351	22.0865	20.3915
	22.1157	20.3484
	22.1448	20.3052
Zm00001d053916	27.66	26.5884
	27.593	26.6711
	27.5259	26.7539
Zm00001d015053	22.7119	19.6183
	22.6511	19.6648
	22.7726	19.5718
Zm00001d002350	34.2899	32.3929
	34.5891	32.201
	34.8883	32.0091
Zm00001d015054	22.4159	19.5331
	22.453	19.7482
	22.4901	19.9632
Actin	25.1685	24.4198
	25.2793	24.247
	25.39	24.0742

## Sheet: Fig. S7
	zmdls	zmdls-treated
GeneID	Cycle threshold	Cycle threshold
Zm00001d032230	24.1834	25.3711
	24.1091	25.2463
	24.0348	25.1215
Zm00001d024486	26.0334	19.6817
	25.8533	19.7547
	25.6731	19.8277
Zm00001d002350	31.032	30.246
	30.7352	30.2427
	30.4383	30.2393
Zm00001d002351	22.1458	21.5361
	22.1913	21.4251
	22.2368	21.3141
ZmActin	25.764	24.4188
	25.7824	24.3749
	25.8007	24.3309
Zm00001d004279	27.1233	26.2336
	27.1581	26.1851
	27.1929	26.1366
Zm00001d053916	27.0954	26.4079
	27.1254	26.3526
	27.1554	26.2973
Zm00001d015053	22.8878	21.1431
	22.9095	21.1503
	22.9313	21.1576
Zm00001d015054	23.7051	21.7827
	23.706	21.83
	23.7042	21.7354
ZmDLS	29.8176	29.2285
	29.5098	29.3685
	29.6637	29.5084
ZmActin	24.7313	23.3733
	24.688	23.2595
	24.6447	23.1457

## Sheet: Fig. S8
	B73	B73-treated
GeneID	Cycle threshold	Cycle threshold
MYB76	27.4519	26.9202
	27.2467	27.0392
	27.3493	26.9797
MYB101	22.4914	21.5816
	21.8849	21.4894
	22.1882	21.5355
MYB119	25.73	26.18
	26	26.3
	25.865	26.24
MYB91	29.63	30.67
	30.21	29.73
	29.92	30.2
MYB97	33.61	33.27
	34.04	34.76
	33.825	34.015
MYB104	27.7	28.11
	27.72	28.22
	27.71	28.165
Actin	23.3472	23.94
	23.484	23.98
	23.4156	23.96
