# Supplementary material for: Identification and functional analysis of ZmDLS associated with the response to biotic stress in maize
Source: Frontiers journal article supplement (doi:10.3389/fpls.2023.1162826), 2023-07-20
Supplement: Data_Sheet_1.zip [file Data_Sheet_1.zip]

Table S1. 43 ZmTPSs identified by bioinformatics analysis and their basic information

| Group | Gene ID        | Gene name | Length | Molecular weight | Theoretical pI | Genome position          | Subcellular localization |
|-------|----------------|-----------|--------|------------------|----------------|--------------------------|--------------------------|
| TPS-a | Zm00001d000337 | None      | 554    | 63850.728        | 4.989          | Chr10:66-1163            | Chlo                     |
|       | Zm00001d004484 | None      | 445    | 51448.939        | 5.364          | Chr2:114598015-114600114 | Cyto                     |
|       | Zm00001d004509 | ZmTPS17   | 557    | 63294.479        | 4.921          | Chr2:115859006-115861844 | Cyto                     |
|       | Zm00001d024207 | ZmTPS6    | 548    | 63731.339        | 5.121          | Chr10:56446489-56449417  | Chlo                     |
|       | Zm00001d024208 | ZmTPS12   | 494    | 57262.916        | 5.31           | Chr10:56531883-56542918  | cyto                     |
|       | Zm00001d024210 | ZmTPS11   | 548    | 63938.252        | 4.904          | Chr10:56611786-56614909  | Cyto                     |
|       | Zm00001d024211 | ZmTPS13   | 549    | 63829.202        | 4.94           | Chr10:56725577-56728537  | Cyto                     |
|       | Zm00001d024234 | ZmTPS23   | 553    | 64436.659        | 5.229          | Chr10:58548223-58557517  | Nucl                     |
|       | Zm00001d024359 | ZmTPS22   | 472    | 54193.409        | 6.011          | Chr10:66773173-66776124  | vacu                     |
|       | Zm00001d024477 | ZmTPS9    | 528    | 61314.167        | 4.781          | Chr10:72975155-72977628  | Cyto                     |
|       | Zm00001d024478 | ZmTPS4    | 554    | 63878.869        | 5.04           | Chr10:73138215-73141345  | Chlo                     |
|       | Zm00001d024479 | None      | 494    | 57262.916        | 5.31           | Chr10:73296507-73297376  | Cyto                     |
|       | Zm00001d024480 | ZmTPS5    | 152    | 17987.96         | 5.18           | Chr10:73297790-73298997  | Cyto                     |
|       | Zm00001d024481 | None      | 554    | 63868.826        | 4.937          | Chr10:73442791-73446010  | Chlo                     |
|       | Zm00001d024486 | ZmTPS10   | 533    | 61533.515        | 5.145          | Chr10:73709085-73712625  | Cyto                     |
|       | Zm00001d024667 | None      | 121    | 14267.506        | 6.896          | Chr10:82869683-82873455  | Cyto                     |
|       | Zm00001d024669 | None      | 554    | 64090.915        | 5.244          | Chr10:82923300-82925885  | Chlo                     |
|       | Zm00001d029139 | ZmTPS31   | 545    | 61930.873        | 5.022          | Chr1:60187359-60190294   | Cyto                     |
|       | Zm00001d029195 | ZmTPS8    | 539    | 62025.544        | 4.85           | Chr1:61777169-61783234   | Cyto                     |
|       | Zm00001d029523 | None      | 506    | 59940.831        | 5.336          | Chr1:74533261-74535868   | Cyto                     |
|       | Zm00001d032230 | ZmTPS7    | 559    | 63907.653        | 6.044          | Chr1:218044601-218051385 | Extr                     |

|         |                |             |     |           |       |                          |      |
|---------|----------------|-------------|-----|-----------|-------|--------------------------|------|
|         | Zm00001d035682 | ZmTPS15     | 608 | 70319.559 | 6.603 | Chr6:40982316-40988980   | Chlo |
|         | Zm00001d037092 | ZmTPS26     | 602 | 67973.118 | 5.757 | Chr6:111878353-111883068 | Chlo |
|         | Zm00001d045054 | ZmTPS19/STC | 643 | 72109.363 | 5.788 | Chr9:11188093-11192433   | Chlo |
|         | Zm00001d047440 | ZmTPS21     | 373 | 41731.385 | 4.946 | Chr9:130202509-130210660 | Cyto |
| TPS-b   | Zm00001d004279 | ZmTPS18     | 570 | 65725.425 | 7.465 | Chr2:99777895-99842379   | Chlo |
|         | Zm00001d018611 | None        | 425 | 47051.574 | 6.111 | Chr7:845376-846882       | cyto |
| TPS-c   | Zm00001d024512 | ZmCPS3      | 785 | 87641.423 | 5.645 | Chr10:75069682-75075862  | Nucl |
|         | Zm00001d029648 | AN2/ZmCPS2  | 825 | 92761.966 | 6.027 | Chr1:81307314-81312008   | Chlo |
|         | Zm00001d032961 | AN1/ZmCPS1  | 855 | 97565.132 | 6.368 | Chr1:244858884-244867408 | Chlo |
|         | Zm00001d048867 | None        | 595 | 66584.49  | 5.56  | Chr4:6755310-6757503     | Chlo |
|         | Zm00001d048874 | ZmCPS4      | 797 | 90212.944 | 5.948 | Chr4:6825819-6830625     | Chlo |
| TPS-e/f | Zm00001d041082 | ZmKSL2      | 800 | 89179.11  | 5.134 | Chr3:96077284-96081039   | Chlo |
|         | Zm00001d002349 | ZmKSL3      | 802 | 90809.887 | 6.39  | Chr2:10674212-10679342   | Chlo |
|         | Zm00001d002350 | ZmKSL5      | 590 | 67719.304 | 6.467 | Chr2:10686321-10689881   | Chlo |
|         | Zm00001d002351 | ZmTPS1      | 590 | 67327.759 | 6.05  | Chr2:10715920-10724623   | Mito |
|         | Zm00001d024514 | ZmKSL6      | 840 | 94759.961 | 5.537 | Chr10:75445940-75450421  | Chlo |
|         | Zm00001d032858 | ZmKSL4      | 848 | 95107.217 | 5.042 | Chr1:240465139-240471273 | Chlo |
|         | Zm00001d049957 | ZmKSL1      | 827 | 92385.802 | 6.832 | Chr4:55492468-55496277   | Chlo |
| TPS-g   | Zm00001d015053 | ZmTPS2      | 581 | 65428.444 | 5.674 | Chr5:73220320-73222932   | Chlo |
|         | Zm00001d015054 | ZmTPS3      | 574 | 64779.517 | 5.675 | Chr5:73448400-73451222   | Chlo |
|         | Zm00001d053916 | ZmTPS2-like | 591 | 67274.819 | 6.471 | Chr4:243626570-243629334 | Plas |
|         | Zm00001d053918 | ZmTPS2      | 286 | 32942.906 | 4.84  | Chr4:243641011-243642284 | Chlo |
