# Supplementary material for: Identification and functional analysis of ZmDLS associated with the response to biotic stress in maize
Source: Frontiers journal article supplement (doi:10.3389/fpls.2023.1162826), 2023-07-20
Supplement: Data_Sheet_1.zip [file Data_Sheet_1.zip]

Table S4. Analysis of *cis*-acting elements in *ZmDLS* promoter

| Site Name        | Organism                                                      | Position                                                                                   | Matrix score | Sequence                  |
|------------------|---------------------------------------------------------------|--------------------------------------------------------------------------------------------|--------------|---------------------------|
| GARE-motif       | <i>Brassica oleracea</i>                                      | 1854                                                                                       | 7            | TCTGTTG                   |
| plant_AP-2-like  | <i>Oryza sativa</i>                                           | 1783                                                                                       | 8            | CGACCAGG                  |
| GT1-motif        | <i>Arabidopsis thaliana/Avena sativa</i>                      | 220,541,1899                                                                               | 6,7          | GGTTAA/GGTTAAT            |
| TATA             | <i>Arabidopsis thaliana</i>                                   | 6,397                                                                                      | 8            | TATAAAAT                  |
| ATC-motif        | <i>Spinacia oleracea</i>                                      | 711                                                                                        | 8            | AGTAATCT                  |
| Myb-binding site | <i>Nicotiana tabacum</i>                                      | 594,725,1854                                                                               | 6            | CTGTTG/CAACAG             |
| MYB              | <i>Arabidopsis thaliana</i>                                   | 221,540,1212, 608, 638, 356                                                                | 6            | TAACCA/CAACCA/TAACCTG     |
| DRE-motif        | <i>Arabidopsis thaliana</i>                                   | 1756                                                                                       | 6            | GCCGAC                    |
| Box 4            | <i>Petroselinum crispum</i>                                   | 331                                                                                        | 6            | ATTAAT                    |
| AuxRR-core       | <i>Nicotiana tabacum</i>                                      | 1918                                                                                       | 7            | GGTCCAT                   |
| STRE             | <i>Arabidopsis thaliana</i>                                   | 461                                                                                        | 5            | AGGGG                     |
| AAGAA-motif      | <i>Avena sativa</i>                                           | 1331                                                                                       | 9            | GTAAAGAAA                 |
| CAAT-box         | <i>Nicotiana glutinosa/Pisum sativum/Arabidopsis thaliana</i> | 87,120,228,312,849<br>895,1146,1589,1608<br>1733,1737,106,312<br>849,1248,1588,1607<br>259 | 4,5,5,8      | CAAT/CAAAT/CCAAT/CCCAATTT |
| G-Box            | <i>Arabidopsis thaliana</i>                                   | 1631                                                                                       | 6            | CACGTG                    |
| CAT-box          | <i>Arabidopsis thaliana</i>                                   | 1598                                                                                       | 6            | GCCACT                    |
| TGA-element      | <i>Brassica oleracea</i>                                      | 946                                                                                        | 6            | AACGAC                    |
| ATCT-motif       | <i>Pisum sativum</i>                                          | 714,1294,1604                                                                              | 9            | AATCTAATCC                |
| TATA-box         | <i>Arabidopsis thaliana</i>                                   | 10,59,231,300,308<br>320,362,397,678,887,939                                               | 4            | TATA                      |
| GCN4_motif       | <i>Oryza sativa</i>                                           | 1705                                                                                       | 7            | TGAGTCA                   |
| TCT-motif        | <i>Arabidopsis thaliana</i>                                   | 183                                                                                        | 6            | TCTTAC                    |
| ABRE             | <i>Arabidopsis thaliana</i>                                   | 1631,1632                                                                                  | 5            | ACGTG                     |
| WRE3             | <i>Pisum sativum</i>                                          | 100                                                                                        | 6            | CCACCT                    |
| LTR              | <i>Hordeum vulgare</i>                                        | 1963                                                                                       | 6            | CCGAAA                    |
| MYC              | <i>Arabidopsis thaliana</i>                                   | 1566,1589,1701                                                                             | 6            | CATGTG                    |
| O2-site          | <i>Zea mays</i>                                               | 1466,1907                                                                                  | 9            | GATGATGTGG                |
| ARE              | <i>Zea mays</i>                                               | 283,1558                                                                                   | 6            | AAACCA                    |
| AE-box           | <i>Arabidopsis thaliana</i>                                   | 1388                                                                                       | 8            | AGAAACAA                  |
